# Supplementary material
Source: PubMed Central journal article supplement (PMC2737737)
Supplement: NIHMS130867-supplement-Supp_Data.pdf [file NIHMS130867-supplement-Supp_Data.pdf]

## Supplementary Material

### Time-dependent insulin oligomer reaction pathway prior to fibril formation: Cooling and seeding

Mirco Sorci<sup>1</sup>, Robert A. Grassucci<sup>2</sup>, Ingrid Hahn<sup>3</sup>, Joachim Frank<sup>2,4</sup> and Georges Belfort<sup>1\*</sup>

<sup>1</sup>Howard P. Isermann Department of Chemical and Biological Engineering  
and Center for Biotechnology and Interdisciplinary Studies

Rensselaer Polytechnic Institute, 110 8<sup>th</sup> Street, Troy, NY 12180-3590

<sup>2</sup>HHMI, Department of Biochemistry and Molecular Biophysics,  
Columbia University, 650 W. 168<sup>th</sup> Street, New York, NY 10032

<sup>3</sup>Department of Biomedical Sciences, State University of New York at Albany,  
Wadsworth Center, Empire State Plaza, Albany, NY 12201-0509

<sup>4</sup>Department of Biological Sciences,  
Columbia University, 650 W. 168<sup>th</sup> Street, New York, NY 10032

## Table

**Table SI:** Parameters obtained from the best fit of the empirical model (Eq. (2)) to the cooling data from **Fig. 3**

| $\Delta t_{cool}$ | $k_{app}$          | $t_{50}$ | $t_{lag}$ | $A_{600,asym}$ |
|-------------------|--------------------|----------|-----------|----------------|
| (days)            | (h <sup>-1</sup> ) | (h)      | (h)       | (-)            |
| 0                 | 3.76               | 4        | 3.47      | 1.133          |
| 1                 | 3.83               | 4.03     | 3.52      | 1.127          |
| 4                 | 3.81               | 4.23     | 3.72      | 1.046          |
| 7                 | 3.68               | 4.27     | 3.72      | 0.954          |
| 14                | 5.08               | 4.83     | 4.45      | 0.910          |
| 21                | 3.23               | 4.80     | 4.18      | 0.831          |
| 28                | 2.78               | 4.97     | 4.23      | 0.798          |

## Figure Legend

**Fig. S1.** Plot of the  $A_{600}$  data according to the linearized form of the empirical model (Eq. (3)) for  $\Delta t_{cool}$  for 0 day (◆) (no cooling, reference), 1 day (□), 4 days (△), 7 days (○), 14 days (■), 21 days (▲), 28 days (●). The best fits with the empirical model were respectively:  $y = -5.061t + 18.16$ , ( $R^2=0.983$ );  $y = -4.008t + 7.983$ , ( $R^2=0.980$ );  $y = -3.891t + 8.669$ , ( $R^2=0.963$ );  $y = -2.814t + 6.584$ , ( $R^2=0.934$ );  $y = -2.787t + 7.864$ , ( $R^2=0.957$ );  $y = -3.433t + 9.686$ , ( $R^2=0.936$ );  $y = -2.755t + 8.354$ , ( $R^2=0.908$ ). With  $y = \ln((1 - A_{600})/A_{600})$  and  $t = \text{time}$ .

**Fig. S2.** Apparent rate constant,  $k_{app}$ , as a function of added insulin amount,  $m$  (mg), and derived from a best-fit of the empirical model (Eq. (2)) to the data in **Fig. 10**.

# Figures

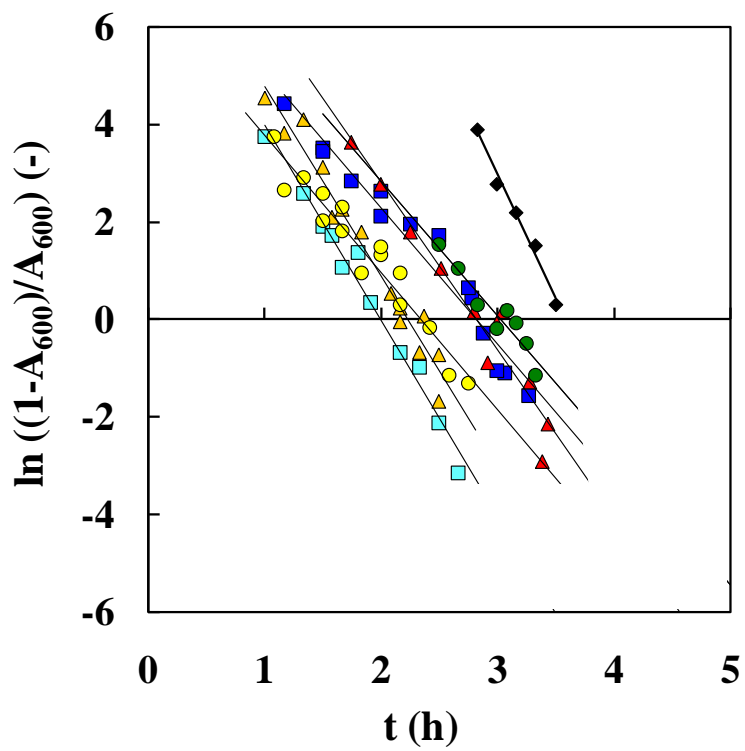

**Fig. S1**

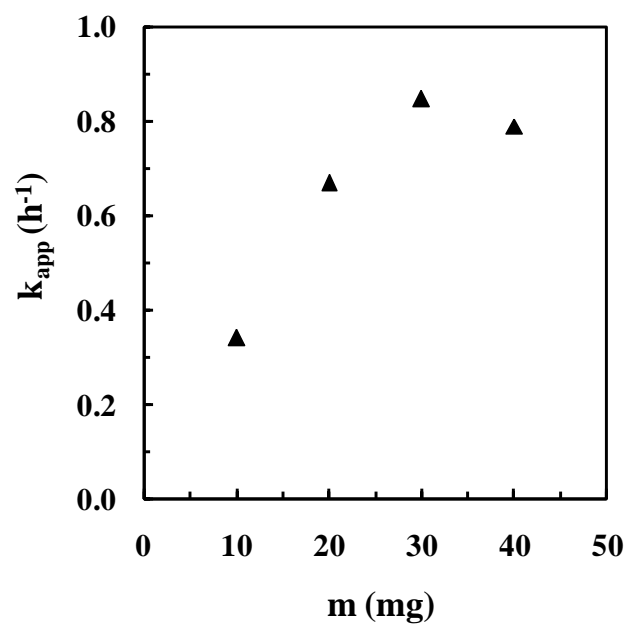

**Fig. S2**
